# Supplementary material for: Ovothiol A is the Main Antioxidant in Fish Lens
Source: PubMed Central journal article supplement (PMC6572425; doi:10.3390/metabo9050095), 2019-05-10
Supplement: metabolites-09-00095-s001.pdf [file metabolites-09-00095-s001.pdf]

## Supplementary Material

for

### Ovothiol A is the main antioxidant in the fish lens

Vadim V. Yanshole<sup>1,2</sup>, Lyudmila V. Yanshole<sup>1,2</sup>, Ekaterina A. Zelentsova<sup>1,2</sup>, Yuri P. Tsentalovich<sup>1,2\*</sup>

<sup>1</sup>International Tomography Center SB RAS, Institutskaya 3a, Novosibirsk 630090, Russia

<sup>2</sup>Novosibirsk State University, Pirogova 2, Novosibirsk 630090, Russia

\*e-mail: [yura@tomo.nsc.ru](mailto:yura@tomo.nsc.ru)

#### Table of content

Supplementary Table S1. Characterization of fish lenses used in this study.

Supplementary Table S2. Concentrations of histidine, ovothiol and glutathione in individual lenses of *S. lucioperca* and *R. rutilus lacustris*.

Supplementary Figure S1. NMR spectrum of ovothiol A (OSH).

Supplementary Figure S2. NMR spectrum of oxidized ovothiol A (OSSO).

Supplementary Figure S3. ESI-Q-TOF mass-spectrum of CID fragments (MS/MS) of isolated parent ion with m/z 202.0643 (OSH).

Supplementary Figure S4. ESI-Q-TOF mass-spectrum of CID fragments (MS/MS) of isolated parent ion with m/z 401.1061 (OSSO).

**Table S1.** Characterization of fish lenses used in this study.

| Sample Number | Fish Type                   | Date of catching | State of water area | Lens weight, mg |
|---------------|-----------------------------|------------------|---------------------|-----------------|
| Group 1       |                             |                  |                     |                 |
| SA1           | <i>S. lucioperca</i>        | 10.10.2017       | Open water          | 158             |
| SA2           | <i>S. lucioperca</i>        | 10.10.2017       | Open water          | 154             |
| SA3           | <i>S. lucioperca</i>        | 10.10.2017       | Open water          | 94              |
| SA4           | <i>S. lucioperca</i>        | 10.10.2017       | Open water          | 75              |
| SA5           | <i>S. lucioperca</i>        | 10.10.2017       | Open water          | 135             |
| SA6           | <i>S. lucioperca</i>        | 10.10.2017       | Open water          | 94              |
| SA7           | <i>S. lucioperca</i>        | 10.10.2017       | Open water          | 79              |
| SA8           | <i>S. lucioperca</i>        | 10.10.2017       | Open water          | 140             |
| Group 2       |                             |                  |                     |                 |
| SW1           | <i>S. lucioperca</i>        | 02.02.2018       | Ice                 | 98              |
| SW2           | <i>S. lucioperca</i>        | 02.02.2018       | Ice                 | 79              |
| SW3           | <i>S. lucioperca</i>        | 02.02.2018       | Ice                 | 78              |
| SW4           | <i>S. lucioperca</i>        | 02.02.2018       | Ice                 | 109             |
| SW5           | <i>S. lucioperca</i>        | 02.02.2018       | Ice                 | 114             |
| SW6           | <i>S. lucioperca</i>        | 02.02.2018       | Ice                 | 80              |
| SW7           | <i>S. lucioperca</i>        | 02.02.2018       | Ice                 | 73              |
| Group 3       |                             |                  |                     |                 |
| RA1           | <i>R. rutilus lacustris</i> | 28.11.2017       | Ice                 | 47              |
| RA2           | <i>R. rutilus lacustris</i> | 28.11.2017       | Ice                 | 33              |
| RA3           | <i>R. rutilus lacustris</i> | 28.11.2017       | Ice                 | 49              |
| RA4           | <i>R. rutilus lacustris</i> | 28.11.2017       | Ice                 | 42              |
| RA5           | <i>R. rutilus lacustris</i> | 28.11.2017       | Ice                 | 35              |
| RA6           | <i>R. rutilus lacustris</i> | 28.11.2017       | Ice                 | 32              |
| RA7           | <i>R. rutilus lacustris</i> | 28.11.2017       | Ice                 | 49              |
| RA8           | <i>R. rutilus lacustris</i> | 28.11.2017       | Ice                 | 35              |
| RA9           | <i>R. rutilus lacustris</i> | 28.11.2017       | Ice                 | 38              |
| RA10          | <i>R. rutilus lacustris</i> | 28.11.2017       | Ice                 | 43              |
| Group 4       |                             |                  |                     |                 |
| RW1           | <i>R. rutilus lacustris</i> | 09.02.2018       | Ice                 | 35              |
| RW2           | <i>R. rutilus lacustris</i> | 09.02.2018       | Ice                 | 35              |
| RW3           | <i>R. rutilus lacustris</i> | 09.02.2018       | Ice                 | 42              |
| RW4           | <i>R. rutilus lacustris</i> | 09.02.2018       | Ice                 | 34              |
| RW5           | <i>R. rutilus lacustris</i> | 09.02.2018       | Ice                 | 34              |

**Table S2.** Concentrations of histidine, othiol and glutathione in individual lenses of *S. lucioperca* and *R. rutilus lacustris* (in nmoles per gram of the lens wet weight).

| Sample Number | Fish Type                   | Date of catching | Histidine | OSH  | GSH |
|---------------|-----------------------------|------------------|-----------|------|-----|
| Group 1       |                             |                  |           |      |     |
| SA1           | <i>S. lucioperca</i>        | 10.10.2017       | 887       | 3036 | 467 |
| SA2           | <i>S. lucioperca</i>        | 10.10.2017       | 877       | 2723 | 309 |
| SA3           | <i>S. lucioperca</i>        | 10.10.2017       | 722       | 3273 | 358 |
| SA4           | <i>S. lucioperca</i>        | 10.10.2017       | 862       | 3160 | 366 |
| SA5           | <i>S. lucioperca</i>        | 10.10.2017       | 734       | 2674 | 539 |
| SA6           | <i>S. lucioperca</i>        | 10.10.2017       | 791       | 3306 | 774 |
| SA7           | <i>S. lucioperca</i>        | 10.10.2017       | 901       | 2958 | 371 |
| SA8           | <i>S. lucioperca</i>        | 10.10.2017       | 887       | 2764 | 548 |
| Group 2       |                             |                  |           |      |     |
| SW1           | <i>S. lucioperca</i>        | 02.02.2018       | 344       | 1774 | 564 |
| SW2           | <i>S. lucioperca</i>        | 02.02.2018       | 321       | 1544 | 454 |
| SW3           | <i>S. lucioperca</i>        | 02.02.2018       | 349       | 1654 | 579 |
| SW4           | <i>S. lucioperca</i>        | 02.02.2018       | 324       | 1507 | 403 |
| SW5           | <i>S. lucioperca</i>        | 02.02.2018       | 317       | 1638 | 369 |
| SW6           | <i>S. lucioperca</i>        | 02.02.2018       | 324       | 1532 | 481 |
| SW7           | <i>S. lucioperca</i>        | 02.02.2018       | 339       | 1758 | 554 |
| Group 3       |                             |                  |           |      |     |
| RA1           | <i>R. rutilus lacustris</i> | 28.11.2017       | 370       | 1156 | 127 |
| RA2           | <i>R. rutilus lacustris</i> | 28.11.2017       | 306       | 939  | 315 |
| RA3           | <i>R. rutilus lacustris</i> | 28.11.2017       | 387       | 1217 | 66  |
| RA4           | <i>R. rutilus lacustris</i> | 28.11.2017       | 208       | 911  | 91  |
| RA5           | <i>R. rutilus lacustris</i> | 28.11.2017       | 468       | 1301 | 406 |
| RA6           | <i>R. rutilus lacustris</i> | 28.11.2017       | 291       | 857  | 343 |
| RA7           | <i>R. rutilus lacustris</i> | 28.11.2017       | 409       | 1180 | 365 |
| RA8           | <i>R. rutilus lacustris</i> | 28.11.2017       | 444       | 1173 | 382 |
| RA9           | <i>R. rutilus lacustris</i> | 28.11.2017       | 296       | 1081 | 409 |
| RA10          | <i>R. rutilus lacustris</i> | 28.11.2017       | 266       | 927  | 329 |
| Group 4       |                             |                  |           |      |     |
| RW1           | <i>R. rutilus lacustris</i> | 09.02.2018       | 277       | 390  | 195 |
| RW2           | <i>R. rutilus lacustris</i> | 09.02.2018       | 241       | 162  | 252 |
| RW3           | <i>R. rutilus lacustris</i> | 09.02.2018       | 272       | 271  | 215 |
| RW4           | <i>R. rutilus lacustris</i> | 09.02.2018       | 243       | 252  | 45  |
| RW5           | <i>R. rutilus lacustris</i> | 09.02.2018       | 271       | 256  | 48  |

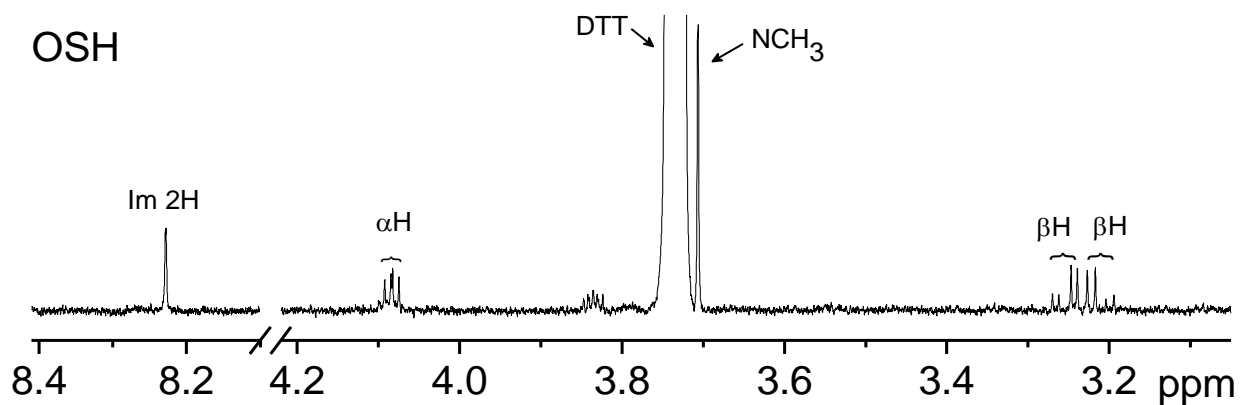

**Figure S1.** NMR spectrum of ovoidiol A (OSH). <sup>1</sup>H NMR (700 MHz, D<sub>2</sub>O): 3.210 (1H, dd, J = 6.9, 16.0 Hz,  $\beta$ H); 3.255 (1H, dd, J = 5.4, 16.0 Hz,  $\beta$ H); 3.707 (3H, d, J = 0.5 Hz, NCH<sub>3</sub>); 4.083 (1H, dd, J = 5.4, 6.9 Hz,  $\alpha$ H); 8.228 (1H, q, J = 0.5 Hz, Im 2H).

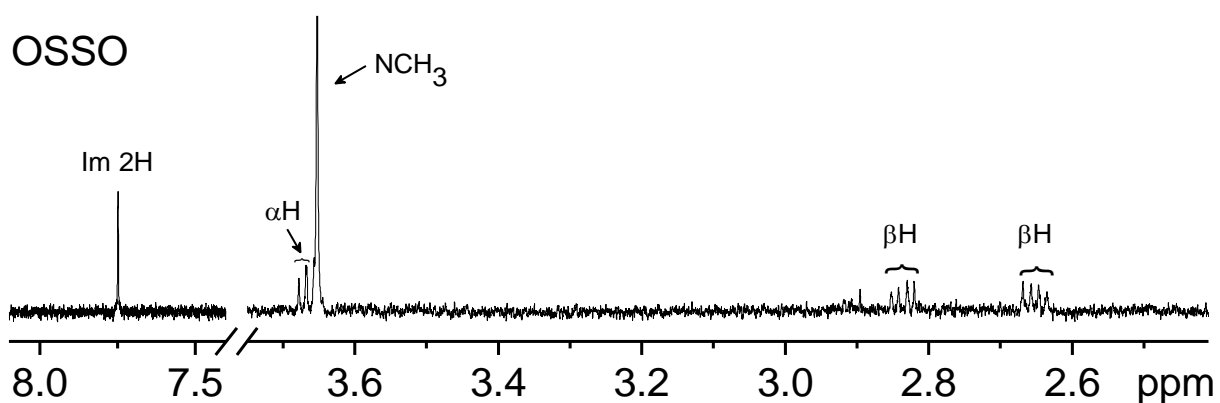

**Figure S2.** NMR spectrum of oxidized ovoidiol A (OSSO). <sup>1</sup>H NMR (700 MHz, D<sub>2</sub>O): 2.653 (1H, dd, J = 8.0, 15.6 Hz,  $\beta$ H); 2.836 (1H, dd, J = 6.9, 15.6 Hz,  $\beta$ H); 3.653 (3H, s, NCH<sub>3</sub>); 3.668 (1H, dd, J = 6.9, 8.0 Hz,  $\alpha$ H); 7.750 (1H, s, Im 2H).

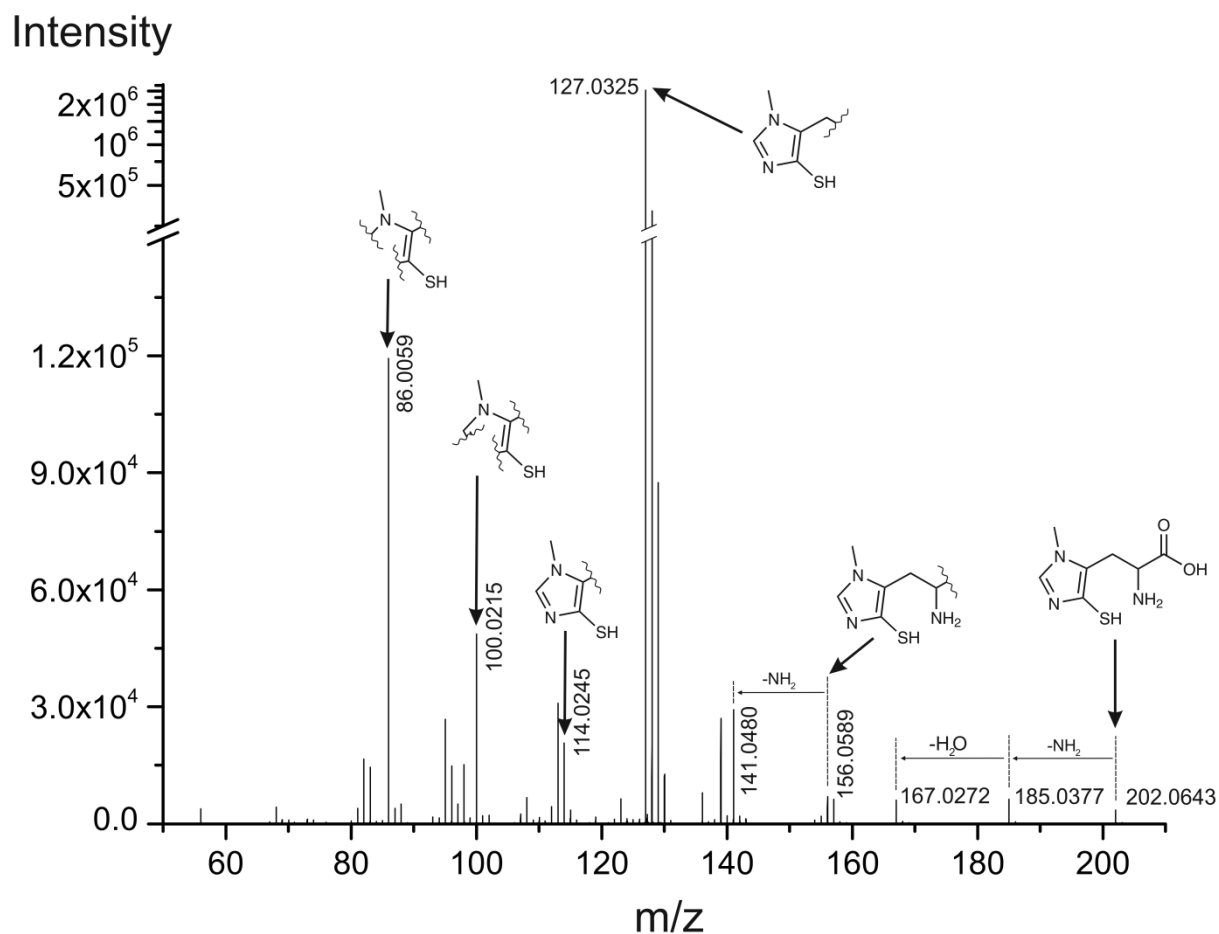

**Figure S3.** ESI-Q-TOF mass-spectrum of CID fragments (MS/MS) of isolated parent ion with  $m/z$  202.0643 (OSH). Collision energy 35eV, positive ion mode. Wavy lines indicate the positions of the bond cleavage.

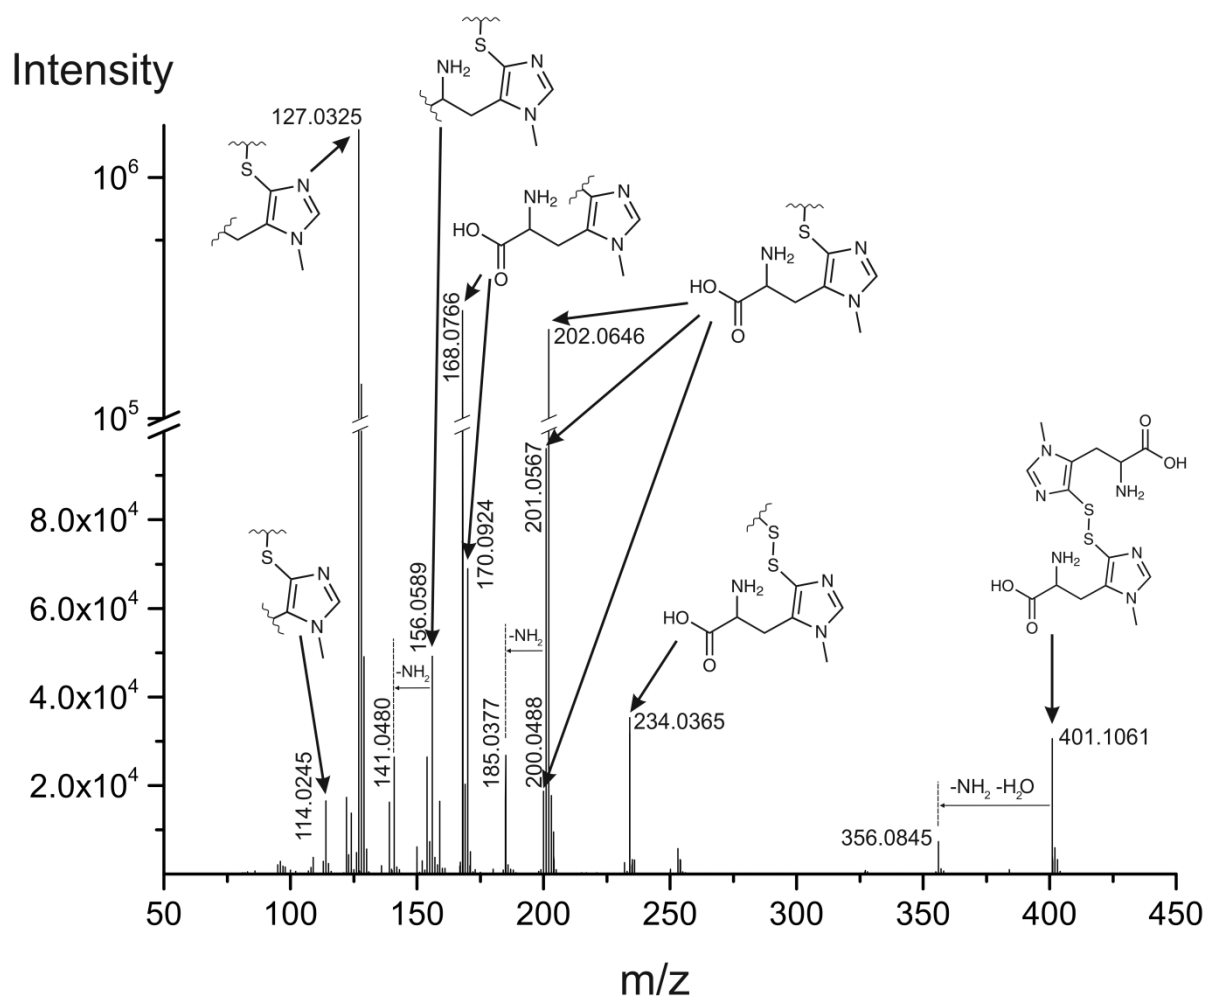

**Figure S4.** ESI-Q-TOF mass-spectrum of CID fragments (MS/MS) of isolated parent ion with  $m/z$  401.1061 (OSSO). Collision energy 35eV, positive ion mode. Wavy lines indicate the positions of the bond cleavage.
